# Supplementary material for: One-pot reductive amination of carbonyl compounds with nitro compounds over a Ni/NiO composite
Source: Royal Society of Chemistry journal article supplement (doi:10.1039/d0ra06937j), 2020-01-01
Supplement: d0ra06937j1.pdf [file d0ra06937j1.pdf]

*Electronic supplementary information (ESI) for*

## **One-pot Reductive Amination of Carbonyl Compounds with Nitro Compounds over Ni/NiO composites**

Yusuke Kita, Sayaka Kai, Lesandre Binti Supriadi Rustad, Keigo Kamata,  
Michikazu Hara\*

Laboratory for Materials and Structures, Institute of Innovative Research,  
Tokyo Institute of Technology  
Nagatsuta-cho 4259, Midori-ku, Yokohama 226-8503 (Japan)  
Fax: (+81)045-924-5381  
E-mail: hara.m.ae@m.titech.ac.jp

Advanced Low Carbon Technology Research and Development Program (ALCA),  
Japan Science and Technology Agency (JST)  
4-1-8 Honcho, Kawaguchi 332-0012 (Japan)

1. Materials
2. Characterization
3. Preparation of Ni/NiO
4. Preparation of Supported Ni Catalysts
5. Catalytic one-pot reductive amination
6. Reuse experiment
7. Spectral data
8. Copies of  $^1\text{H}$  and  $^{13}\text{C}$  NMR spectra
9. References

## 1. Materials

The following materials were used as received: NiO (Aldrich, 99.8% metal basis, <50 nm particle size), Raney alloy (Wako, ca. 50% as Ni), nitrobenzene (Kanto), toluene (Kanto), dichloromethane (Kanto), tetrahydrofuran (Kanto), methanol (Kanto), *N,N*-dimethylformamide (Kanto), acetonitrile (TCI), chloroform-*d* (Isotech), monochlorobenzene (Kanto), 4-nitroanisole (Kanto), *o*-methylnitrobenzene (TCI), methyl 4-nitrobenzoate (TCI), 5-chloronitrobenzene (TCI), *o*-tolaldehyde (TCI), *p*-anisaldehyde (TCI), and ethyl 4-formylbenzoate (Wako). Benzaldehyde (Wako) was distilled before use. TiO<sub>2</sub> (ST-01) and Nb<sub>2</sub>O<sub>5</sub>·*n*H<sub>2</sub>O were supplied from Ishihara Sangyo Kaisha, and Companhia Brasileira de Metalurgia e Mineração, respectively. SiO<sub>2</sub> (Q10) was provided by Fuji Silysia Chemical. ZrO<sub>2</sub> (JRC-ZRO-9) was obtained from the Catalysis Society of Japan as reference catalysts. Metal oxide supports were calcined at 500 °C for 2 h under air before preparation of the supported Ni catalysts.

## 2. Characterization

Brunauer–Emmett–Teller (BET) specific surface areas of the samples were measured by nitrogen adsorption–desorption at –196 °C (Quantachrome Nova-4200e). Prior to the adsorption measurements, the samples were degassed in situ under vacuum at 150 °C for 1 h. The BET surface area was determined using the multipoint BET algorithm in the  $P/P_0$  range from 0.05 to 0.3. X-ray diffraction (XRD; Ultima IV, Rigaku) patterns of all samples were obtained using Cu K $\alpha$  radiation (40 kV, 40 mA) in the  $2\theta$  range of 15–85°. X-ray photoelectron spectroscopy (XPS; ESCA-3200 Shimadzu) measurements were performed using Mg K $\alpha$  radiation (1486.6 eV). Samples were pressed into pellets and fixed on double-sided carbon tape. The binding energies were calibrated using sputtered C (1s peak at 284.6 eV). <sup>1</sup>H NMR (400 MHz), and <sup>13</sup>C{<sup>1</sup>H} NMR (100 MHz) spectra were measured on Bruker Avance III-400 spectrometers. All <sup>1</sup>H NMR chemical shifts were recorded in ppm ( $\delta$ ) relative to tetramethylsilane or referenced to the chemical shifts of residual solvent resonances (CHCl<sub>3</sub> was used as internal standard,  $\delta$  7.26). All <sup>13</sup>C NMR chemical shifts were recorded in ppm ( $\delta$ ) relative to carbon resonances in CDCl<sub>3</sub> at  $\delta$  77.16. Scanning electron microscope (SEM) measurements were conducted using a multi-purpose transmission electron microscope (JEM-2100 plus) at an acceleration voltage of 200 kV with SEM detector (the samples were dispersed on a carbon sheet with ethanol, and dried). Inductively coupled plasma-atomic emission spectroscopy (ICP-AES) analyses were performed with a Shimadzu ICPS-8100 spectrometer. Flash column chromatography was conducted using an automated flash chromatography system (Smart Flash EPCLC AI-580s, Yamazen).

### 3. Preparation of Ni/NiO composite

The NiO was treated in 5% H<sub>2</sub>/Ar (flow rate = 30 mL/min) at designated temperature (200–500 °C) for 2 h to give Ni/NiO-X (X = reduction temperature).

### 4. Preparation of Supported Ni Catalysts

The 5 wt% Ni/support catalysts were prepared by wet impregnation method.<sup>S1</sup> Ni(NO<sub>3</sub>)<sub>2</sub>•6H<sub>2</sub>O (0.25 g, 0.86 mmol) was dissolved in water (20 mL). The support (1 g) was added into the aqueous Ni(NO<sub>3</sub>)<sub>2</sub> solution, and the mixture was evaporated at 60 °C until dryness. The obtained solid was further dried at 90 °C overnight. The dried sample was calcined at 300 °C for 1 h under air and reduced with 5% H<sub>2</sub>/Ar (30 mL/min) at 500 °C for 30 min.

### 5. Catalytic one-pot reductive amination

The catalytic reaction was conducted in an 18 mL stainless-steel autoclave equipped with a magnetic stirrer. 50 mg of catalyst was loaded into the reactor with 1.2 mmol of aldehyde, 1 mmol of nitro compound and 1 mL of toluene. The autoclave was purged with H<sub>2</sub> several times to remove air and then pressurized with H<sub>2</sub> at 1 MPa. After heating at 80 °C for 20 h, the catalyst was filtered off. The filtrate was analysed by GC and GC-MS using chlorobenzene as an internal standard.

For substrate scope, the filtrate was evaporated to dryness after heating at 80 °C for 20 h. And the resulting crude mixture was purified by flash column chromatography.

### 6. Reuse experiments

The catalytic reaction was conducted according to the general procedure. For reuse experiments, the catalyst was recovered by filtration, washed with MeOH (25 mL), dried at 90 °C for 5 h. Reduction treatment: The recovered catalyst was reduced under H<sub>2</sub> flow (20 mL/min) at 150 °C for 1 h. XRD patterns of the recovered catalyst was not changed (Fig. S2).

### 7. Spectral Data

*N*-Benzylaniline (**3aa**)<sup>S2</sup>

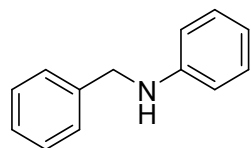

After the reaction was completed, the catalyst was separated by filtration. The crude product was purified by flash column chromatography (hexane : EtOAc = 9 : 1→7 : 3) to give the pure title compound (98%).

<sup>1</sup>H NMR (400 MHz, CDCl<sub>3</sub>): δ = 7.38–7.32 (m, 4H), 7.29–7.24 (m, 1H), 7.17 (dd, *J* = 8.0, 8.0 Hz, 2H), 6.71 (dd, *J* = 8.0, 8.0 Hz, 1H), 6.64 (d, *J* = 8.0 Hz, 2H), 4.33 (s, 2H), 4.02 (br s, 1H).

<sup>13</sup>C NMR (100 MHz, CDCl<sub>3</sub>): δ = 148.5, 140.0, 129.6, 128.9, 127.8, 127.5, 117.8, 113.2, 48.5.

*N*-Benzyl-4-methoxyaniline (**3ba**)<sup>S3</sup>

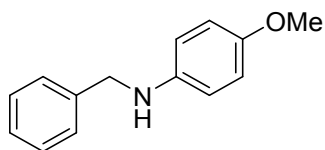

After the reaction was completed, catalyst was separated by filtration and the obtained solution was evaporated and dried *in vacuo*. The crude product was purified by flash column chromatography (hexane : EtOAc = 8 : 2→5 : 5) to give the pure title compound (93 %).

<sup>1</sup>H NMR (400 MHz, CDCl<sub>3</sub>): δ = 7.37–7.24 (m, 5H), 6.77 (d, *J* = 8.8 Hz, 2H), 6.60 (d, *J* = 8.8 Hz, 2H), 4.27 (s, 2H), 3.73 (s, 3H).

<sup>13</sup>C NMR (100 MHz, CDCl<sub>3</sub>): δ = 152.3, 142.5, 139.7, 128.6, 127.6, 127.2, 115.0, 114.1, 55.8, 49.3.

Methyl 4-(benzylamino)benzoate (**3ca**)<sup>S4</sup>

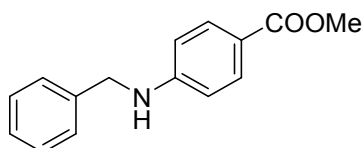

After the reaction was completed, catalyst was separated by filtration and the obtained solution was evaporated and dried *in vacuo*. The crude product was purified by flash column chromatography (hexane : EtOAc = 8 : 2→6 : 4) to give the pure title compound (74 %).

<sup>1</sup>H NMR (400 MHz, CDCl<sub>3</sub>): δ = 7.83 (d, *J* = 8.8 Hz, 2H), 7.34–7.23 (m, 5H), 6.55 (d, *J* = 8.8 Hz, 2H), 4.61 (br s, 1H), 4.33 (s, 2H), 3.80 (s, 3H).

<sup>13</sup>C NMR (100 MHz, CDCl<sub>3</sub>): δ = 167.4, 151.9, 138.5, 131.6, 128.8, 127.5, 127.4, 118.6, 111.7, 51.5, 47.6.

*N*-benzyl-4-chloroaniline (**3da**)<sup>S3</sup>

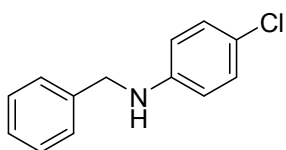

After the reaction was completed, catalyst was separated by filtration and the obtained solution was evaporated and dried *in vacuo*. The crude product was purified by flash column chromatography (hexane : EtOAc = 8 : 2→6 : 4) to give the pure title compound (88 %).

<sup>1</sup>H NMR (400 MHz, CDCl<sub>3</sub>): δ = 7.35–7.25 (m, 5H), 7.10 (d, *J* = 8.8 Hz, 2H), 6.54 (d, *J* = 8.8 Hz, 2H), 4.30 (s, 2H).

<sup>13</sup>C NMR (100 MHz, CDCl<sub>3</sub>): δ = 148.9, 139.2, 129.3, 128.9, 127.6, 127.6, 122.1, 114.2, 48.4.

*N*-Benzyl-2-methylaniline (**3ea**)<sup>S5</sup>

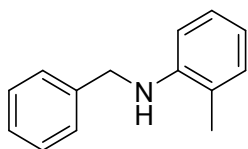

After the reaction was completed, catalyst was separated by filtration and the obtained solution was evaporated and dried *in vacuo*. The crude product was purified by flash column chromatography (hexane : EtOAc = 8 : 2→5 : 5) to give the pure title compound (82 %).

$^1\text{H}$  NMR (400 MHz,  $\text{CDCl}_3$ ):  $\delta$  = 7.38–7.32 (m, 4H), 7.29–7.25 (m, 1H), 7.11–7.06 (m, 2H), 6.67 (dd,  $J$  = 7.2, 7.2 Hz, 1H), 6.61 (d,  $J$  = 7.6 Hz, 1H), 4.36 (s, 1H), 3.84 (br s, 1H), 2.15 (s, 3H).

$^{13}\text{C}$  NMR (100 MHz,  $\text{CDCl}_3$ ):  $\delta$  = 146.2, 139.7, 130.2, 128.8, 127.7, 127.4, 127.3, 122.0, 117.3, 110.4, 48.5, 17.6.

#### *N*-(4-methoxybenzyl)aniline (**3ab**)<sup>S5</sup>

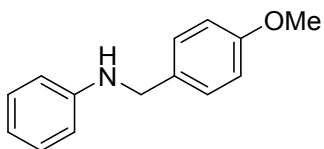

After the reaction was completed, catalyst was separated by filtration and the obtained solution was evaporated and dried *in vacuo*. The crude product was purified by flash column chromatography (hexane : EtOAc = 8 : 2→6 : 4) to give the pure title compound (67 %).

$^1\text{H}$  NMR (400 MHz,  $\text{CDCl}_3$ ):  $\delta$  = 7.30 (d,  $J$  = 8.8 Hz, 2H), 7.17 (dd,  $J$  = 7.6, 8.4 Hz, 2H), 6.88 (d,  $J$  = 8.8 Hz, 2H), 6.71 (dd,  $J$  = 7.6, 7.2 Hz, 1H), 6.63 (d,  $J$  = 8.8 Hz, 2H), 4.25 (s, 2H), 3.93 (br s, 1H), 3.80 (s, 3H).

$^{13}\text{C}$  NMR (100 MHz,  $\text{CDCl}_3$ ):  $\delta$  = 159.0, 148.4, 131.6, 129.4, 129.0, 117.6, 114.2, 113.0, 55.4, 47.9.

#### Ethyl 4-((phenylamino)methyl)benzoate (**3ac**)<sup>S6</sup>

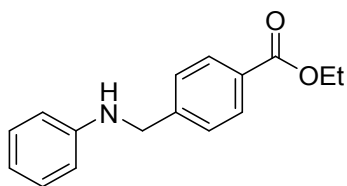

After the reaction was completed, catalyst was separated by filtration and the obtained solution was evaporated and dried *in vacuo*. The crude product was purified by flash column chromatography (hexane : EtOAc = 8 : 2→6 : 4) to give the pure title compound (94 %).

$^1\text{H}$  NMR (400 MHz,  $\text{CDCl}_3$ ):  $\delta$  = 8.01 (d,  $J$  = 8.0 Hz, 2H), 7.43 (d,  $J$  = 8.0 Hz, 2H), 7.16 (dd,  $J$  = 7.6, 8.4 Hz, 2H), 6.72 (dd,  $J$  = 7.2, 7.6 Hz, 1H), 6.61 (d,  $J$  = 8.0 Hz, 2H), 4.40–4.34 (m, 4H), 1.39 (t,  $J$  = 4.2 Hz, 3H).

$^{13}\text{C}$  NMR (100 MHz,  $\text{CDCl}_3$ ):  $\delta$  = 166.6, 148.1, 145.3, 130.0, 129.4, 127.2, 117.8, 113.0, 61.1, 47.9, 14.5.

*N*-(4-bromobenzyl)aniline (**3ad**)<sup>S7</sup>

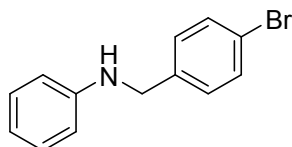

After the reaction was completed, catalyst was separated by filtration and the obtained solution was evaporated and dried *in vacuo*. The crude product was purified by flash column chromatography (hexane : EtOAc = 10 : 1 → 5 : 1) to give the pure title compound (95 %).

<sup>1</sup>H NMR (400 MHz, CDCl<sub>3</sub>): δ = 7.44 (d, *J* = 7.9 Hz, 2H), 7.23 (d, *J* = 7.9 Hz, 2H), 7.16 (dd, *J* = 7.9, 7.3 Hz, 2H), 6.72 (dd, *J* = 7.3, 7.3 Hz, 1H), 6.59 (d, *J* = 7.9 Hz, 2H), 4.34 (s, 2H).

<sup>13</sup>C NMR (100 MHz, CDCl<sub>3</sub>): δ = 147.9, 138.6, 131.8, 129.4, 129.1, 121.0, 117.9, 113.0, 47.7.

*N*-(2-methylbenzyl)aniline (**3ae**)<sup>S8</sup>

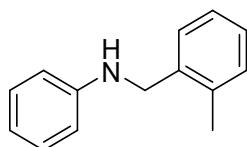

After the reaction was completed, catalyst was separated by filtration and the obtained solution was evaporated and dried *in vacuo*. The crude product was purified by flash column chromatography (hexane : EtOAc = 8 : 2 → 5 : 5) to give the pure title compound (74 %).

<sup>1</sup>H NMR (400 MHz, CDCl<sub>3</sub>): δ = 7.34–7.32 (m, 1H), 7.20–7.15 (m, 5H), 6.72 (dd, *J* = 7.6, 7.2 Hz, 1H), 6.64 (d, *J* = 8.0 Hz, 2H), 4.27 (s, 2H), 3.84 (br s, 1H), 2.37 (s, 3H).

<sup>13</sup>C NMR (100 MHz, CDCl<sub>3</sub>): δ = 148.6, 137.3, 136.5, 130.7, 129.5, 128.5, 127.6, 126.4, 117.7, 112.9, 46.6, 19.2.

*N*-octylaniline (**3af**)<sup>S9</sup>

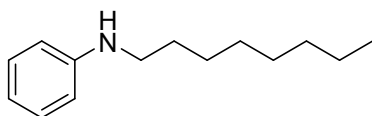

After the reaction was completed, catalyst was separated by filtration and the obtained solution was evaporated and dried *in vacuo*. The yield of was determined based on the phenanthrene as an internal standard.

*m/z* (rel. int.) 205(14), 107(8), 106(100), 77(8).

## 8. NMR spectra

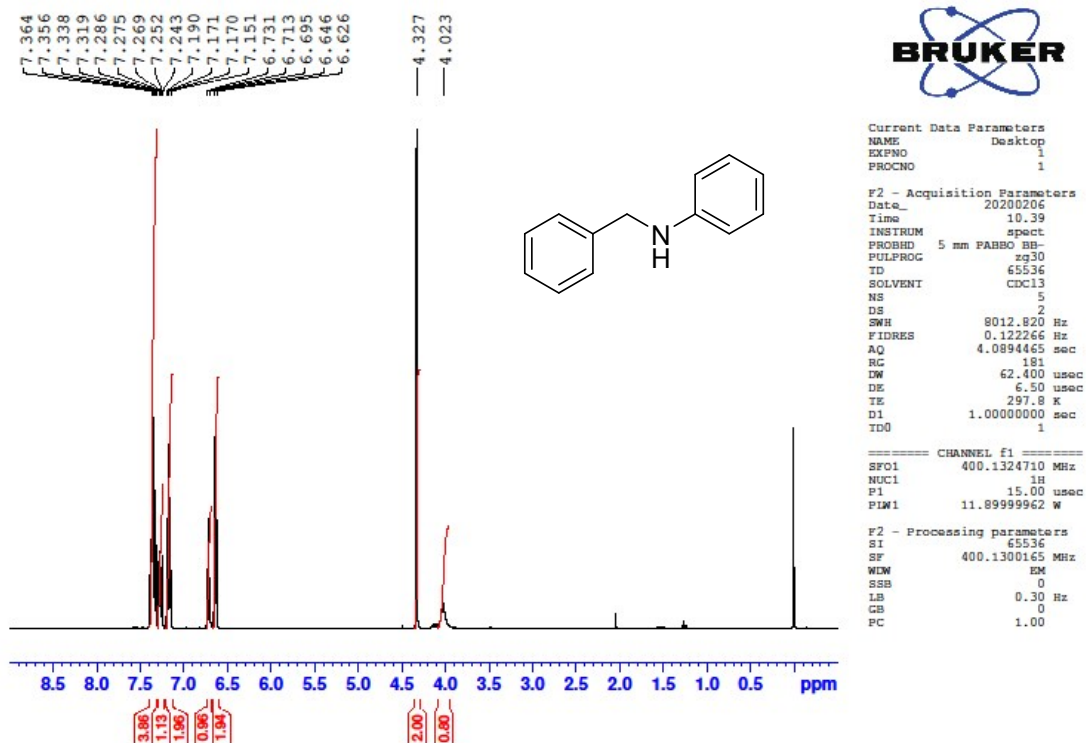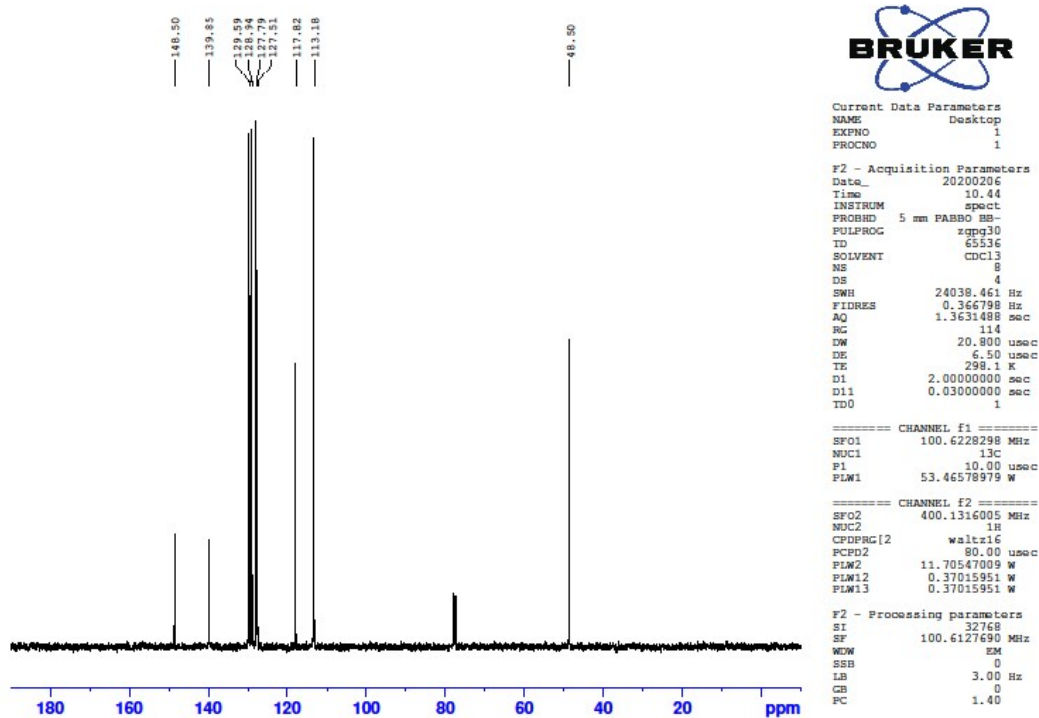

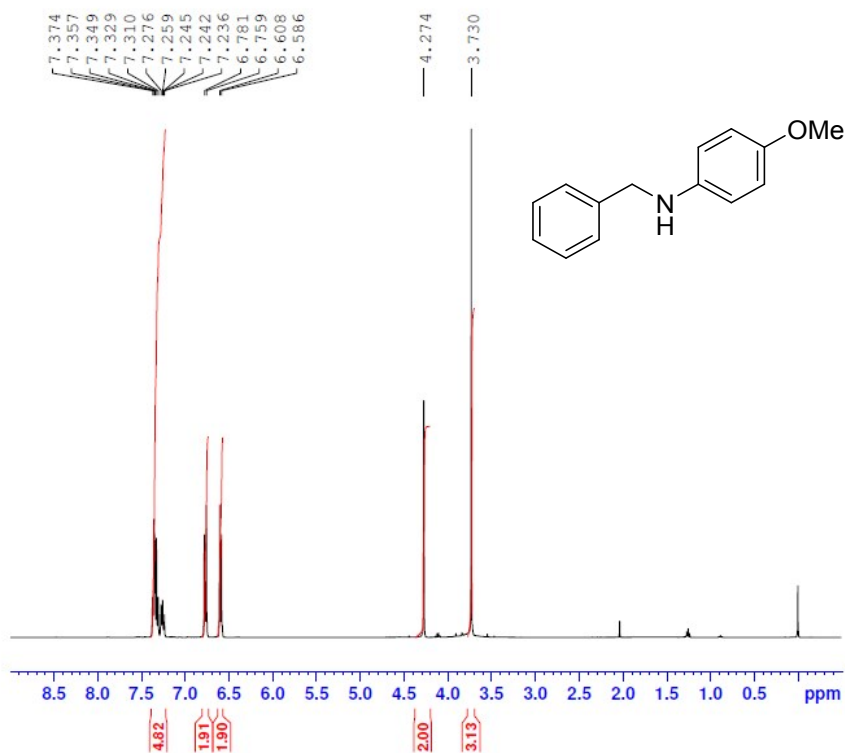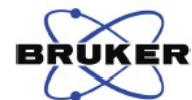

Current Data Parameters  
 NAME Desktop  
 EXPNO 1  
 PROCNO 1

F2 - Acquisition Parameters  
 Date\_ 20190918  
 Time 16.10  
 INSTRUM spect  
 PROBHD 5 mm PABBO BB-  
 PULPROG zg30  
 TD 65536  
 SOLVENT CDC13  
 NS 16  
 DS 2  
 SWH 8012.820 Hz  
 FIDRES 0.122266 Hz  
 AQ 4.0894465 sec  
 RG 101  
 DW 62.400 usec  
 DE 6.50 usec  
 TE 298.8 K  
 D1 1.00000000 sec  
 TDO 1

CHANNEL f1  
 SFO1 400.1324710 MHz  
 NUC1 1H  
 P1 15.00 usec  
 PLW1 11.89999962 W

F2 - Processing parameters  
 SI 65536  
 SF 400.1300187 MHz  
 WDW EM  
 SSB 0  
 LB 0.30 Hz  
 GB 0  
 PC 1.00

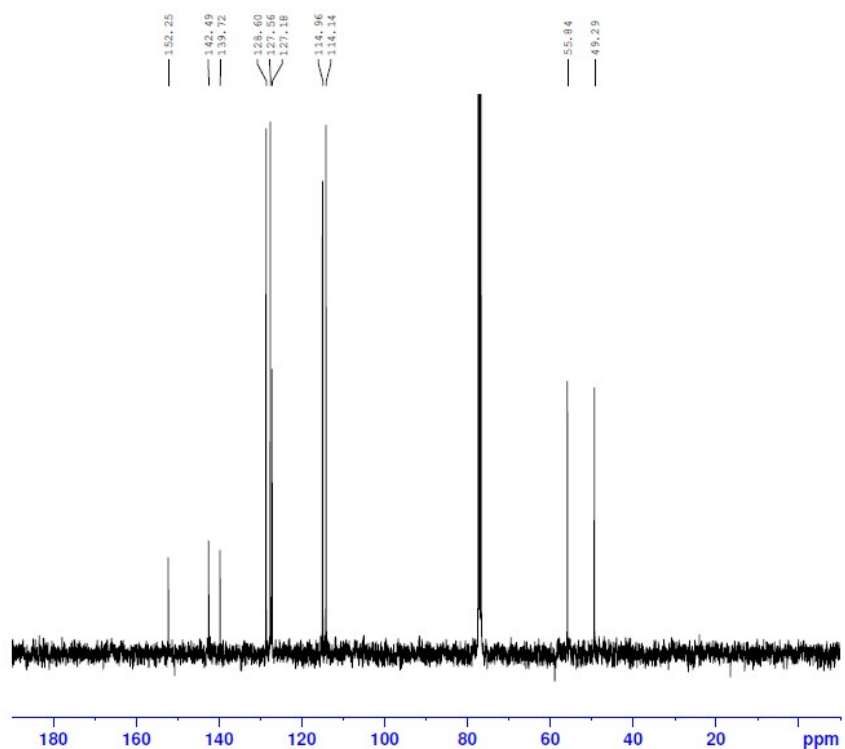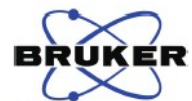

Current Data Parameters  
 NAME Desktop  
 EXPNO 1  
 PROCNO 1

F2 - Acquisition Parameters  
 Date\_ 20190918  
 Time 16.18  
 INSTRUM spect  
 PROBHD 5 mm PABBO BB-  
 PULPROG zgpg30  
 TD 65536  
 SOLVENT CDC13  
 NS 68  
 DS 4  
 SWH 24038.461 Hz  
 FIDRES 0.366798 Hz  
 AQ 1.3631488 sec  
 RG 203  
 DW 20.800 usec  
 DE 6.50 usec  
 TE 300.0 K  
 D1 2.00000000 sec  
 D11 0.03000000 sec  
 TDO 1

CHANNEL f1  
 SFO1 100.6228298 MHz  
 NUC1 13C  
 P1 10.00 usec  
 PLW1 53.46578979 W

CHANNEL f2  
 SFO2 400.1316005 MHz  
 NUC2 1H  
 CPDPRG2 waltz16  
 PCPD2 80.00 usec  
 PLW2 11.70547009 W  
 PLW12 0.37015951 W  
 PLW13 0.37015951 W

F2 - Processing parameters  
 SI 32768  
 SF 100.6127690 MHz  
 WDW EM  
 SSB 0  
 LB 3.00 Hz  
 GB 0  
 PC 1.40



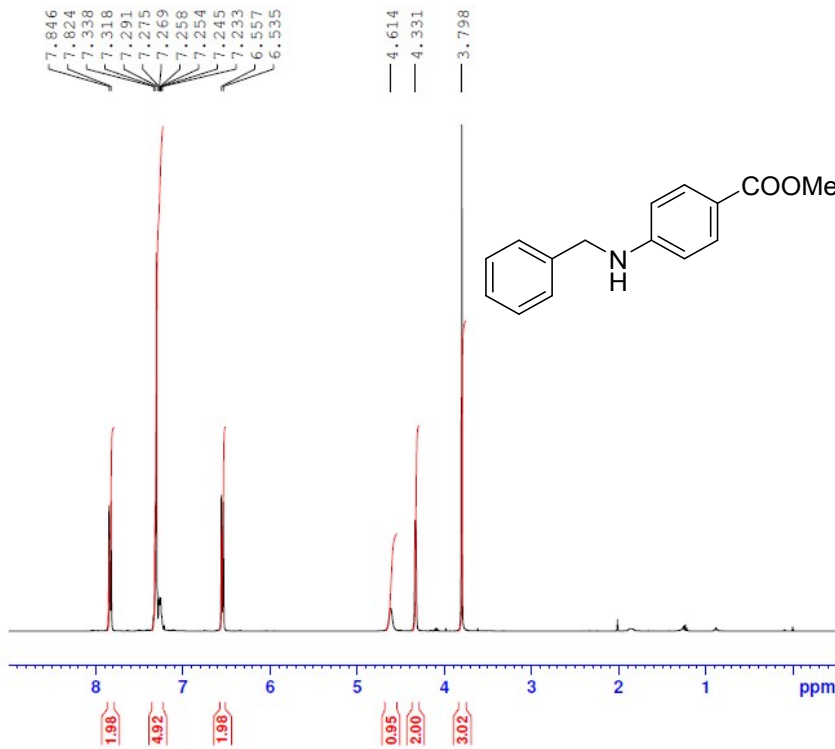

**BRUKER**

Cur  
NAME Desktop  
EXPNO 1  
PROCNO 1

F2 - Acquisition Parameters  
Date\_ 20191018  
Time 15.08  
INSTRUM spect  
PROBHD 5 mm PABBO BB-  
PULPROG zg30  
TD 65536  
SOLVENT CDC13  
NS 16  
DS 2  
SWH 8012.820 Hz  
FIDRES 0.122266 Hz  
AQ 4.0894465 sec  
RG 32  
DW 62.400 usec  
DE 6.50 usec  
TE 298.4 K  
D1 1.0000000 sec  
TDO 1

----- CHANNEL f1 -----  
SF01 400.1324710 MHz  
NUC1 1H  
P1 15.00 usec  
PLW1 11.89999962 W

F2 - Processing parameters  
SI 65536  
SF 400.1300280 MHz  
WDW EM  
SSB 0  
LB 0.30 Hz  
GB 0  
PC 1.00

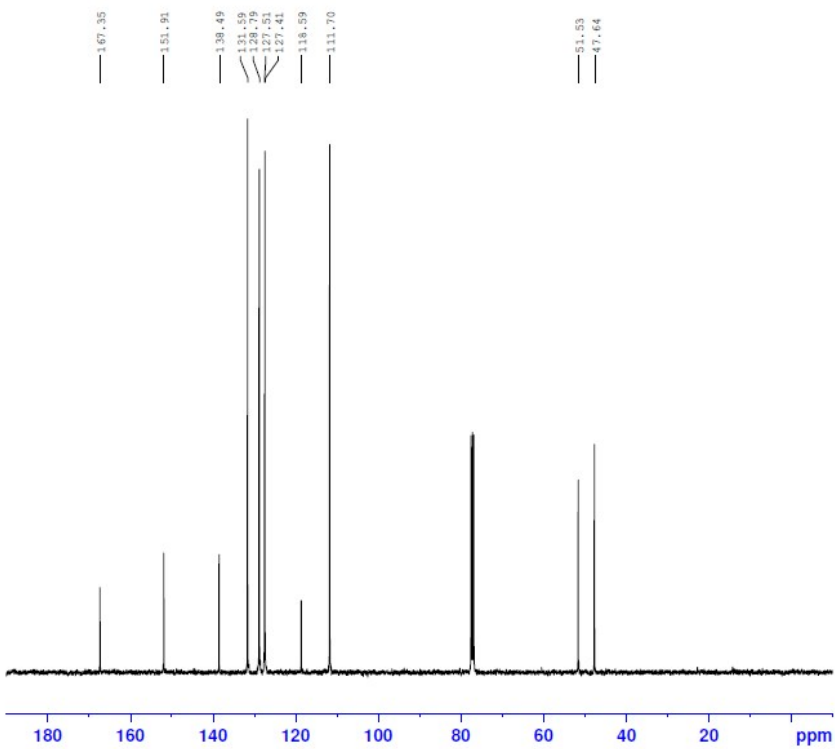

**BRUKER**

C1  
NAME Desktop  
EXPNO 1  
PROCNO 1

F2 - Acquisition Parameters  
Date\_ 20191018  
Time 15.19  
INSTRUM spect  
PROBHD 5 mm PABBO BB-  
PULPROG zgpg30  
TD 65536  
SOLVENT CDC13  
NS 120  
DS 4  
SWH 24038.461 Hz  
FIDRES 0.366798 Hz  
AQ 1.3631488 sec  
RG 203  
DW 20.800 usec  
DE 6.50 usec  
TE 300.0 K  
D1 2.0000000 sec  
D11 0.0300000 sec  
TDO 1

----- CHANNEL f1 -----  
SF01 100.6228298 MHz  
NUC1 13C  
P1 10.00 usec  
PLW1 53.46578979 W

----- CHANNEL f2 -----  
SF02 400.1316005 MHz  
NUC2 1H  
CPDPRG[2] waltz16  
PCPD2 80.00 usec  
PLW2 11.70547009 W  
PLW12 0.37015951 W  
PLW13 0.37015951 W

F2 - Processing parameters  
SI 32768  
SF 100.6127690 MHz  
WDW EM  
SSB 0  
LB 3.00 Hz  
GB 0  
PC 1.40

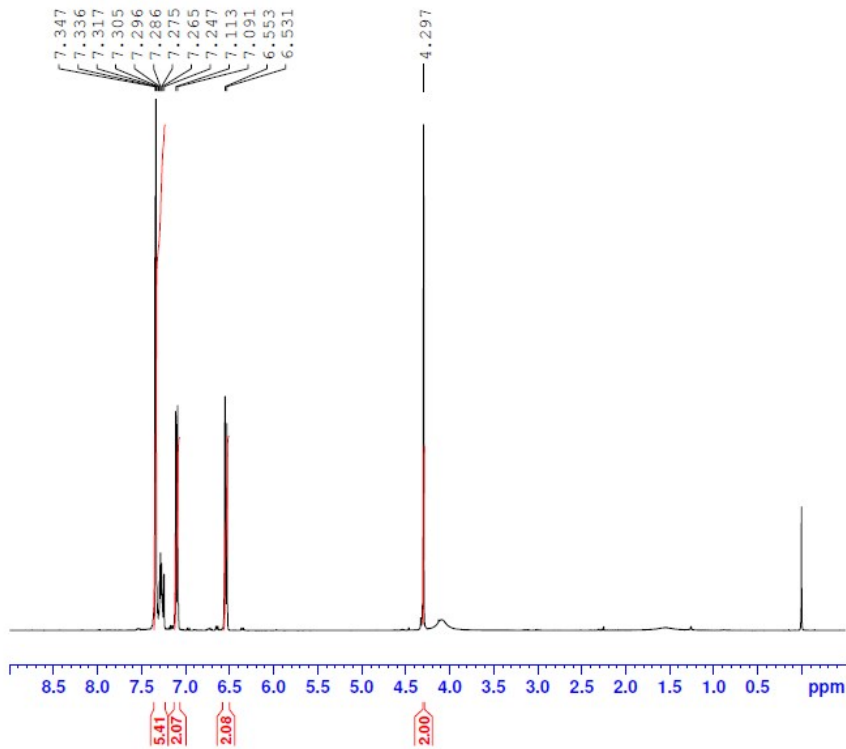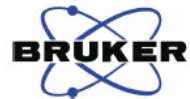

Current Data Parameters  
 NAME Desktop  
 EXPNO 1  
 PROCNO 1

F2 - Acquisition Parameters  
 Date\_ 20191220  
 Time 11.48  
 INSTRUM spect  
 PROBHD 5 mm PABBO BB-  
 PULPROG zg30  
 ID 65536  
 SOLVENT CDCl3  
 NS 8  
 DS 2  
 SWH 8012.820 Hz  
 FIDRES 0.122266 Hz  
 AQ 4.0894465 sec  
 RG 181  
 DW 62.400 usec  
 DE 6.50 usec  
 TE 297.7 K  
 D1 1.00000000 sec  
 TDO 1

----- CHANNEL f1 -----  
 SF01 400.1324710 MHz  
 NUC1 1H  
 P1 15.00 usec  
 PLW1 11.89999962 W

F2 - Processing parameters  
 SI 65536  
 SF 400.1300156 MHz  
 WDW EM  
 SSB 0  
 LB 0.30 Hz  
 GB 0  
 PC 1.00

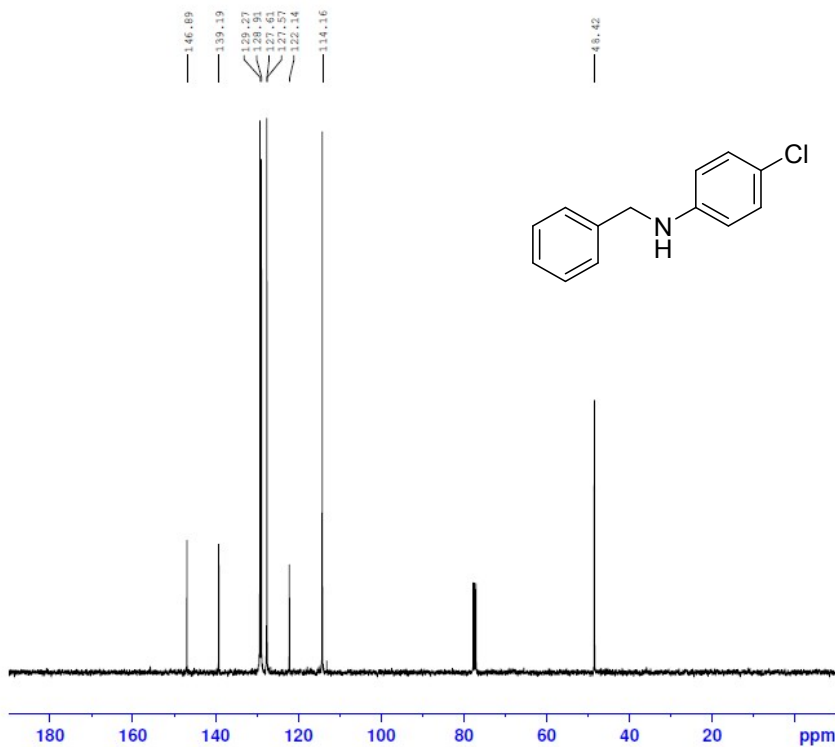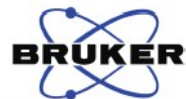

Current Data Parameters  
 NAME Desktop  
 EXPNO 1  
 PROCNO 1

F2 - Acquisition Parameters  
 Date\_ 20191220  
 Time 11.53  
 INSTRUM spect  
 PROBHD 5 mm PABBO BB-  
 PULPROG zgpg30  
 ID 65536  
 SOLVENT CDCl3  
 NS 12  
 DS 4  
 SWH 24038.461 Hz  
 FIDRES 0.366798 Hz  
 AQ 1.3631488 sec  
 RG 203  
 DW 20.800 usec  
 DE 6.50 usec  
 TE 297.9 K  
 D1 2.00000000 sec  
 D11 0.03000000 sec  
 TDO 1

----- CHANNEL f1 -----  
 SF01 100.6228298 MHz  
 NUC1 13C  
 P1 10.00 usec  
 PLW1 53.46578979 W

----- CHANNEL f2 -----  
 SF02 400.1316005 MHz  
 NUC2 1H  
 CPDPRG[2] waltz16  
 PCPD2 80.00 usec  
 PLW2 11.70547009 W  
 PLW12 0.37015951 W  
 PLW13 0.37015951 W

F2 - Processing parameters  
 SI 32768  
 SF 100.6127690 MHz  
 WDW EM  
 SSB 0  
 LB 3.00 Hz  
 GB 0  
 PC 1.40

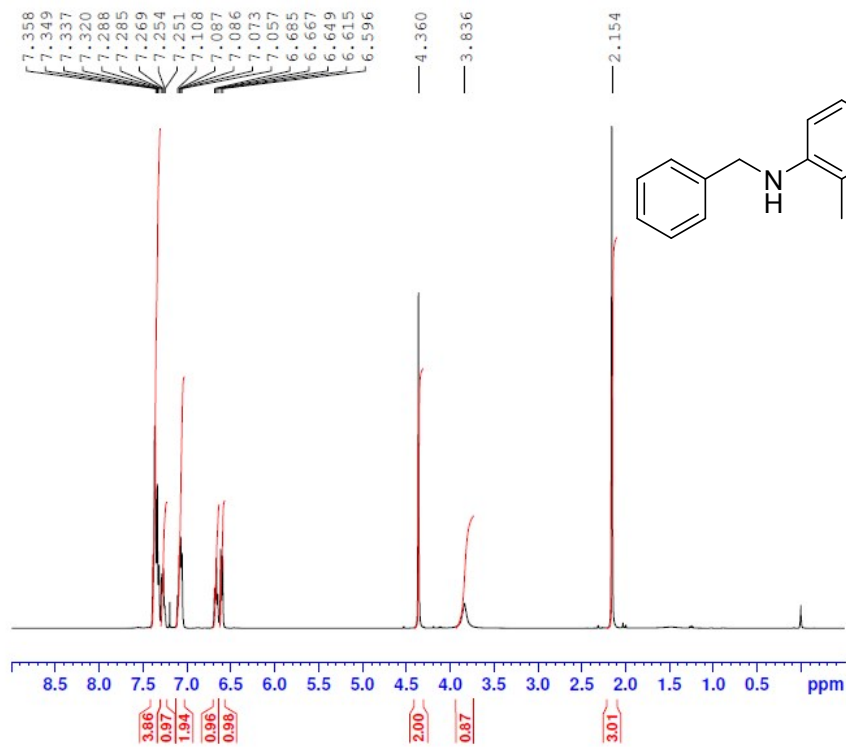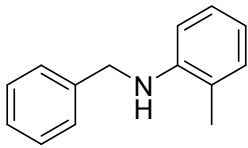

**BRUKER**

Current Data Parameters  
 NAME Desktop  
 EXPNO 1  
 PROCNO 1

F2 - Acquisition Parameters  
 Date\_ 20190910  
 Time 16.36  
 INSTRUM spect  
 PROBHD 5 mm PABBO BB-  
 PULPROG zg30  
 ID 65536  
 SOLVENT CDCl3  
 NS 16  
 DS 2  
 SWH 8012.820 Hz  
 FIDRES 0.122266 Hz  
 AQ 4.0894465 sec  
 RG 64  
 DW 62.400 usec  
 DE 6.50 usec  
 TE 301.1 K  
 D1 1.00000000 sec  
 TDO 1

----- CHANNEL f1 -----  
 SFO1 400.1324710 MHz  
 NUC1 1H  
 P1 15.00 usec  
 PLW1 11.89999962 W

F2 - Processing parameters  
 SI 65536  
 SF 400.1300347 MHz  
 WDW EM  
 SSB 0  
 LB 0.30 Hz  
 GB 0  
 PC 1.00

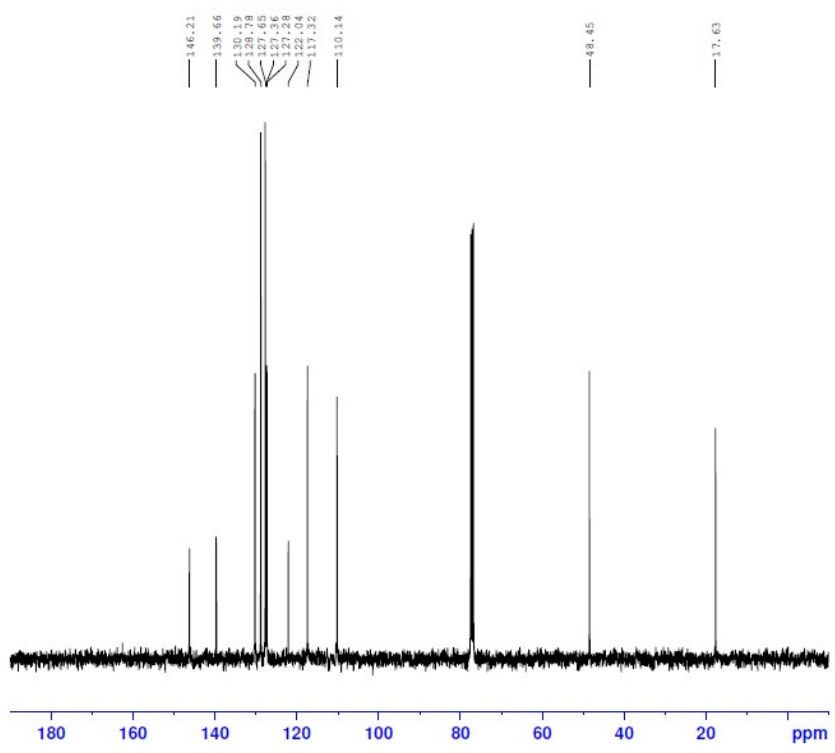

**BRUKER**

Current Data Parameters  
 NAME Desktop  
 EXPNO 1  
 PROCNO 1

F2 - Acquisition Parameters  
 Date\_ 20190910  
 Time 16.46  
 INSTRUM spect  
 PROBHD 5 mm PABBO BB-  
 PULPROG zgpg30  
 ID 65536  
 SOLVENT CDCl3  
 NS 51  
 DS 4  
 SWH 24038.461 Hz  
 FIDRES 0.366798 Hz  
 AQ 1.3631488 sec  
 RG 181  
 DW 20.800 usec  
 DE 6.50 usec  
 TE 302.0 K  
 D1 2.00000000 sec  
 D11 0.03000000 sec  
 TDO 1

----- CHANNEL f1 -----  
 SFO1 100.6228298 MHz  
 NUC1 13C  
 P1 10.00 usec  
 PLW1 53.46578979 W

----- CHANNEL f2 -----  
 SFO2 400.1316005 MHz  
 NUC2 1H  
 CPDPRG2 waltz16  
 PCPD2 80.00 usec  
 PLW2 11.70547009 W  
 PLW12 0.37015951 W  
 PLW13 0.37015951 W

F2 - Processing parameters  
 SI 32768  
 SF 100.6127616 MHz  
 WDW EM  
 SSB 0  
 LB 3.00 Hz  
 GB 0  
 PC 1.40

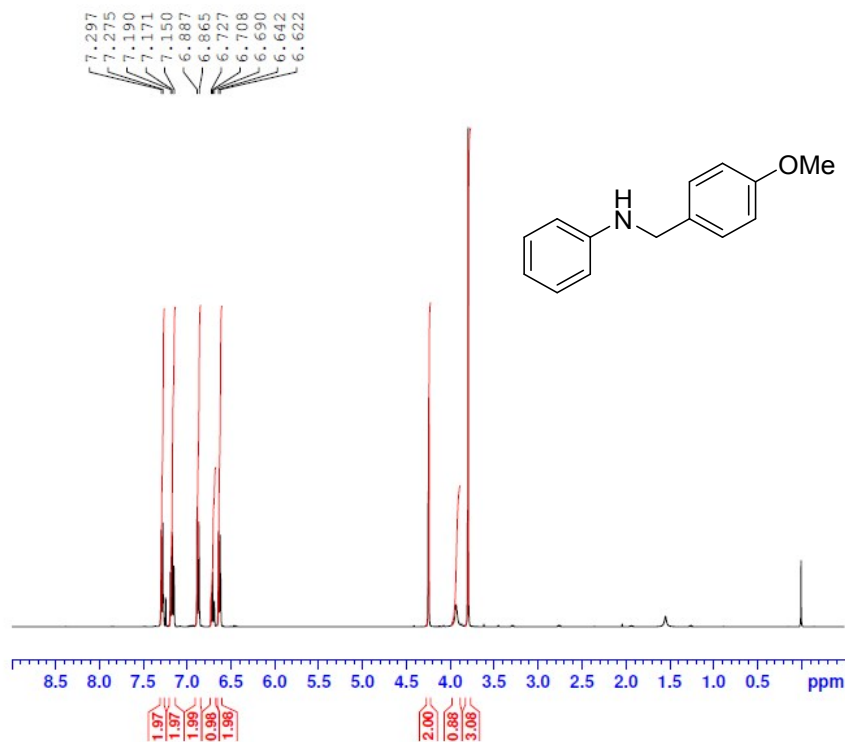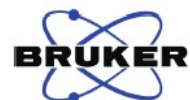

Current Data Parameters  
 NAME Desktop  
 EXPNO 1  
 PROCNO 1

F2 - Acquisition Parameters  
 Date\_ 20200107  
 Time 10.10  
 INSTRUM spect  
 PROBHD 5 mm PABBO BB-  
 PULPROG zg30  
 ID 65536  
 SOLVENT CDCl3  
 NS 2  
 DS 2  
 SWH 8012.820 Hz  
 FIDRES 0.122266 Hz  
 AQ 4.0894465 sec  
 RG 144  
 DW 62.400 usec  
 DE 6.50 usec  
 TE 297.6 K  
 D1 1.00000000 sec  
 TDO 1

----- CHANNEL f1 -----  
 SFO1 400.1324710 MHz  
 NUC1 1H  
 P1 15.00 usec  
 PLW1 11.89999962 W

F2 - Processing parameters  
 SI 65536  
 SF 400.1300161 MHz  
 WDW EM  
 SSB 0  
 LB 0.30 Hz  
 GB 0  
 PC 1.00

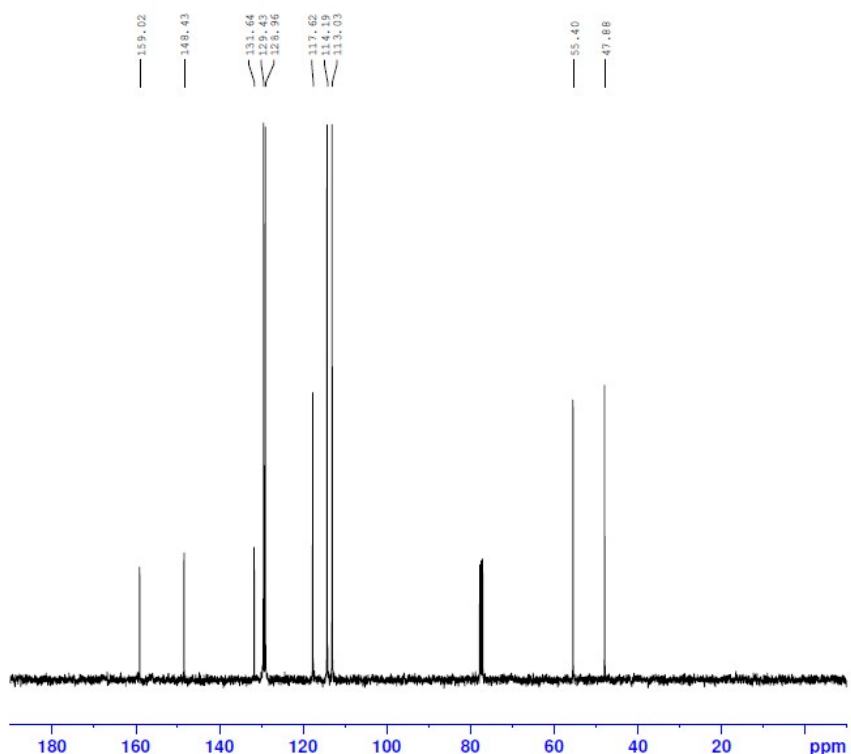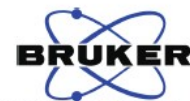

Current Data Parameters  
 NAME Desktop  
 EXPNO 1  
 PROCNO 1

F2 - Acquisition Parameters  
 Date\_ 20200107  
 Time 10.16  
 INSTRUM spect  
 PROBHD 5 mm PABBO BB-  
 PULPROG zgpg30  
 ID 65536  
 SOLVENT CDCl3  
 NS 8  
 DS 4  
 SWH 24038.461 Hz  
 FIDRES 0.366798 Hz  
 AQ 1.3631488 sec  
 RG 203  
 DW 20.800 usec  
 DE 6.50 usec  
 TE 297.7 K  
 D1 2.00000000 sec  
 D11 0.03000000 sec  
 TDO 1

----- CHANNEL f1 -----  
 SFO1 100.6228298 MHz  
 NUC1 13C  
 P1 10.00 usec  
 PLW1 53.46578979 W

----- CHANNEL f2 -----  
 SFO2 400.1316005 MHz  
 NUC2 1H  
 CPDPRG[2] waltz16  
 PCPD2 80.00 usec  
 PLM2 11.70547009 W  
 PLW12 0.37015951 W  
 PLW13 0.37015951 W

F2 - Processing parameters  
 SI 32768  
 SF 100.6127690 MHz  
 WDW EM  
 SSB 0  
 LB 3.00 Hz  
 GB 0  
 PC 1.40

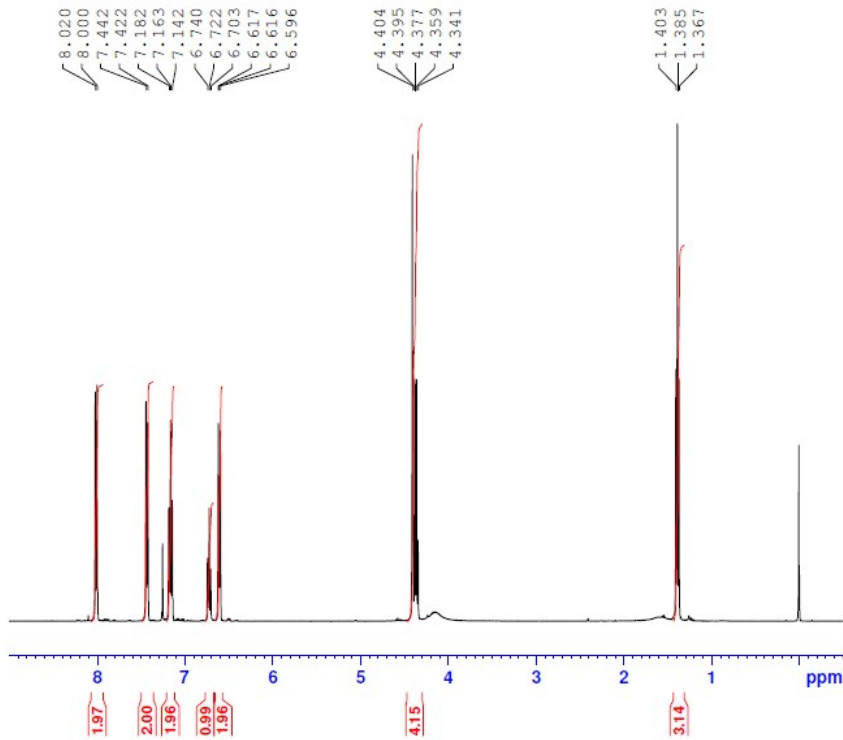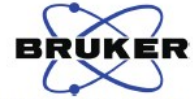

Current Data Parameters  
 NAME Desktop  
 EXPNO 1  
 PROCNO 1

F2 - Acquisition Parameters  
 Date\_ 20191220  
 Time 11.40  
 INSTRUM spect  
 PROBHD 5 mm PABBO BB-  
 PULPROG zg30  
 ID 65536  
 SOLVENT CDCl3  
 NS 5  
 DS 2  
 SWH 8012.820 Hz  
 FIDRES 0.122266 Hz  
 AQ 4.089446 sec  
 RG 161  
 DW 62.400 usec  
 DE 6.50 usec  
 TE 297.6 K  
 D1 1.0000000 sec  
 ID0 1

----- CHANNEL f1 -----  
 SFO1 400.1324710 MHz  
 NUC1 1H  
 P1 15.00 usec  
 PLW1 11.89999962 W

F2 - Processing parameters  
 SI 65536  
 SF 400.1300126 MHz  
 WDW EM  
 SSB 0  
 LB 0.30 Hz  
 GB 0  
 PC 1.00

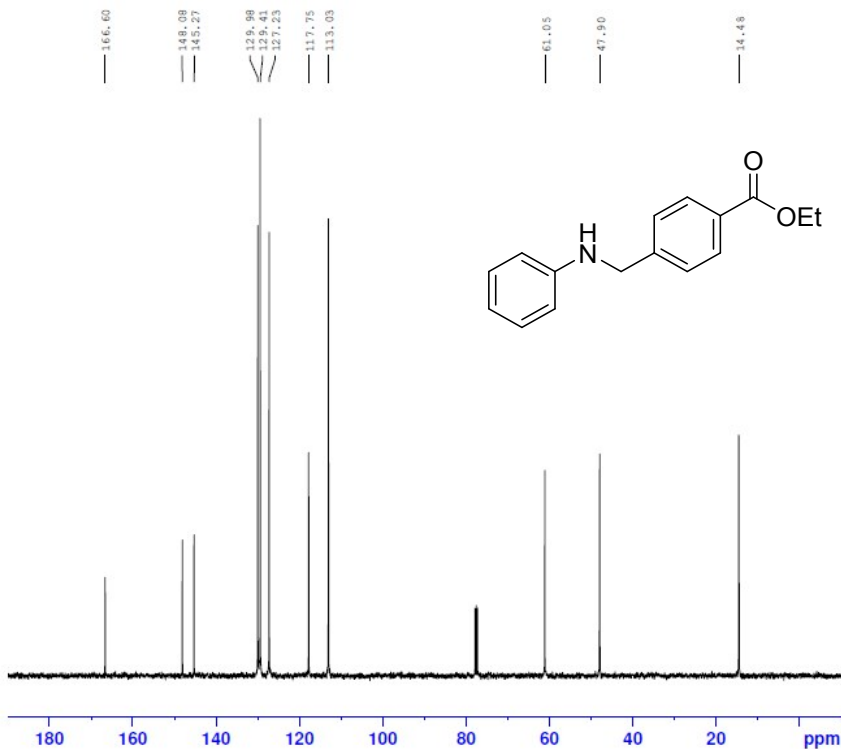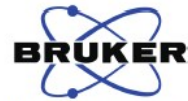

Current Data Parameters  
 NAME Desktop  
 EXPNO 1  
 PROCNO 1

F2 - Acquisition Parameters  
 Date\_ 20191220  
 Time 11.44  
 INSTRUM spect  
 PROBHD 5 mm PABBO BB-  
 PULPROG zgpg30  
 ID 65536  
 SOLVENT CDCl3  
 NS 8  
 DS 4  
 SWH 24038.461 Hz  
 FIDRES 0.366798 Hz  
 AQ 1.3631488 sec  
 RG 203  
 DW 20.800 usec  
 DE 6.50 usec  
 TE 297.7 K  
 D1 2.0000000 sec  
 D11 0.03000000 sec  
 ID0 1

----- CHANNEL f1 -----  
 SFO1 100.6228298 MHz  
 NUC1 13C  
 P1 10.00 usec  
 PLW1 53.46578979 W

----- CHANNEL f2 -----  
 SFO2 400.1316005 MHz  
 NUC2 1H  
 CPDPRG2 waltz16  
 PCPD2 80.00 usec  
 PLW2 11.70547009 W  
 PLW12 0.37015951 W  
 PLW13 0.37015951 W

F2 - Processing parameters  
 SI 32768  
 SF 100.6127690 MHz  
 WDW EM  
 SSB 0  
 LB 3.00 Hz  
 GB 0  
 PC 1.40

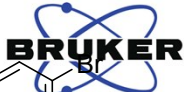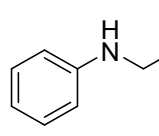

Current Data Parameters  
NAME YK-15-34  
EXPNO 1  
PROCNO 1

F2 - Acquisition Parameters  
Date\_ 20200706  
Time\_ 9.03  
INSTRUM spect  
PROBHD 5 mm PABBO BB-  
PULPROG zg30  
TD 65536  
SOLVENT CDC13  
NS 12  
DS 2  
SWH 8012.820 Hz  
FIDRES 0.122266 Hz  
AQ 4.0894465 sec  
RG 144  
DW 62.400 usec  
DE 6.50 usec  
TE 297.2 K  
D1 1.00000000 sec  
TDO 1

==== CHANNEL f1 =====  
SFO1 400.1318806 MHz  
NUC1 1H  
P1 15.00 usec  
PLW1 8.89999962 W

F2 - Processing parameters  
SI 65536  
SF 400.1300000 MHz  
WDW EM  
SSB 0  
LB 0.30 Hz  
GB 0  
PC 1.00

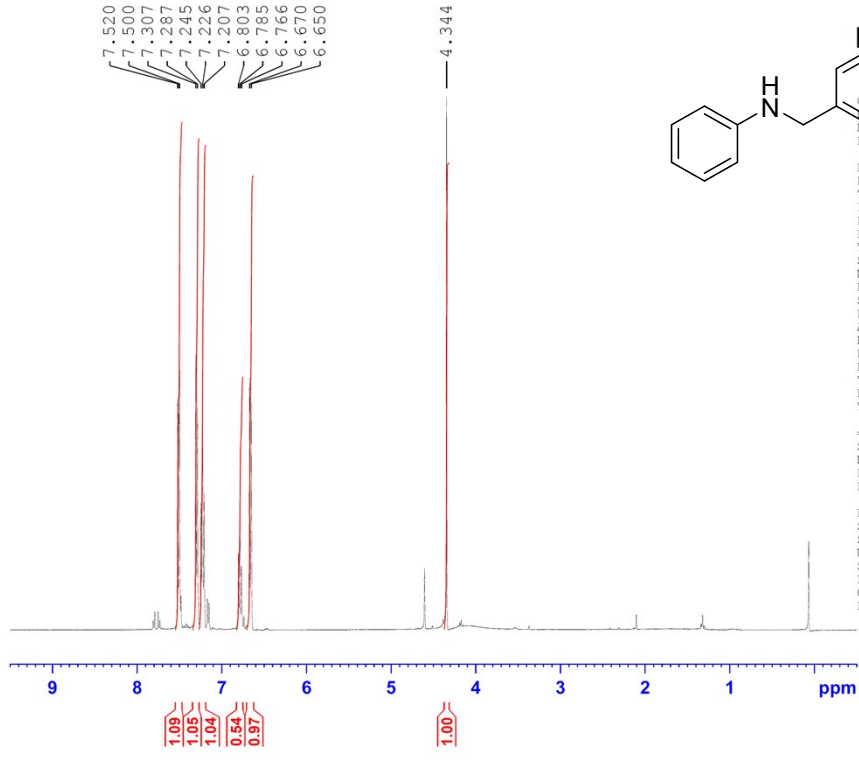

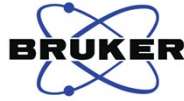

Current Data Parameters  
NAME YK-15-34-13C  
EXPNO 1  
PROCNO 1

F2 - Acquisition Parameters  
Date\_ 20200707  
Time 15.54  
INSTRUM spect  
PROBHD 5 mm PABBO BB-  
PULPROG zgpg30  
TD 65536  
SOLVENT CDCl3  
NS 80  
DS 4  
SWH 24038.461 Hz  
FIDRES 0.366798 Hz  
AQ 1.3631488 sec  
RG 203  
DW 20.800 usec  
DE 6.50 usec  
TE 301.3 K  
D1 2.0000000 sec  
D11 0.0300000 sec  
TDO 1

===== CHANNEL f1 =====  
SFO1 100.6228298 MHz  
NUC1 13C  
P1 10.00 usec  
PLW1 53.46578979 W

===== CHANNEL f2 =====  
SFO2 400.1316005 MHz  
NUC2 1H  
CPDPRG[2] waltz16  
PCPD2 80.00 usec  
PLW2 11.70547009 W  
PLW12 0.37015951 W  
PLW13 0.37015951 W

F2 - Processing parameters  
SI 32768  
SF 100.6127617 MHz  
WDW EM  
SSB 0  
LB 3.00 Hz  
GB 0  
PC 1.40

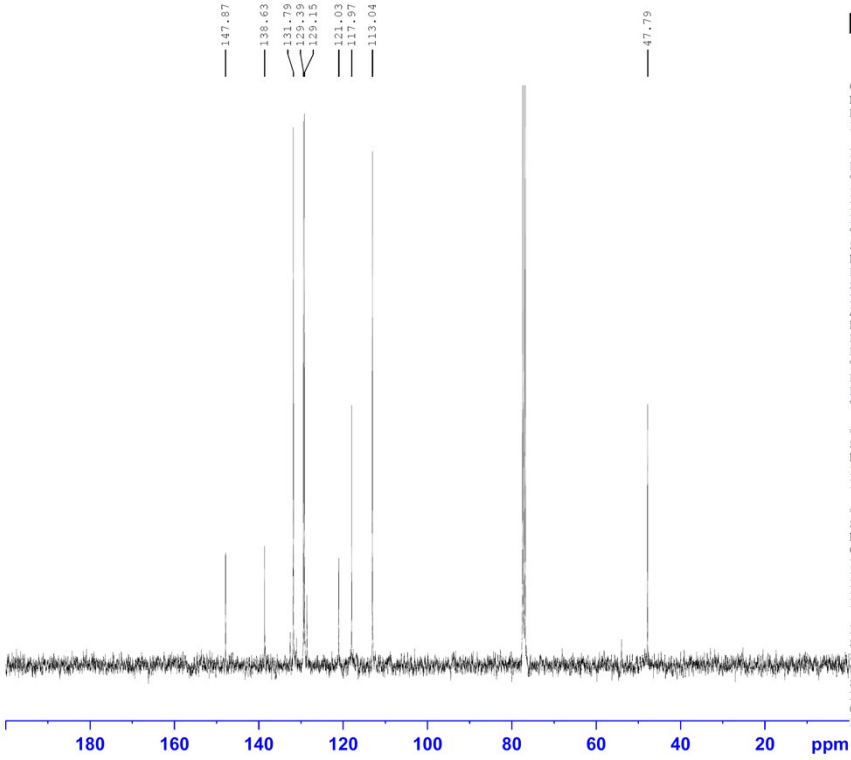

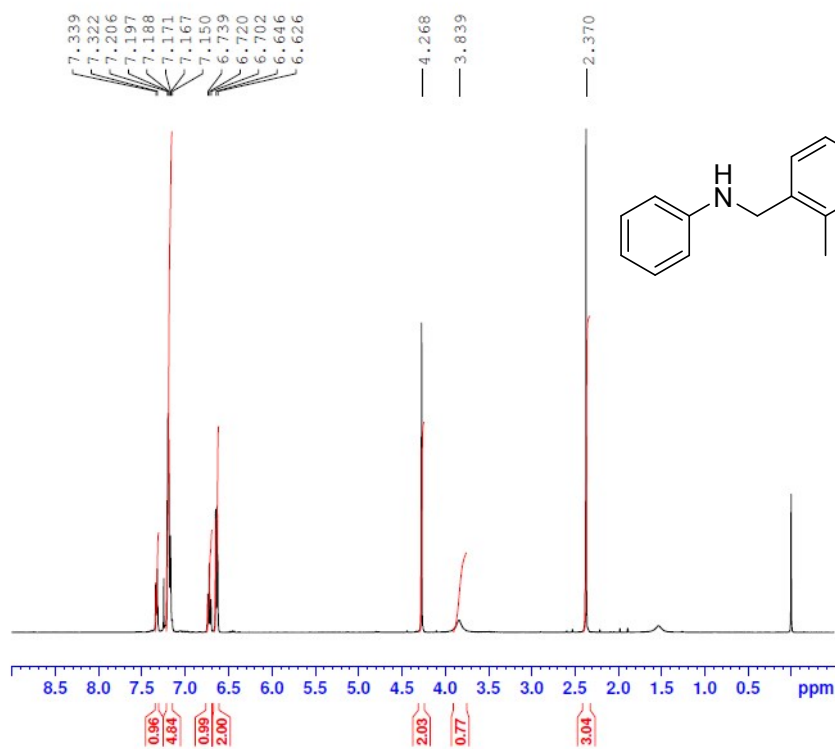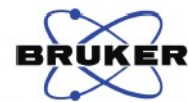

Current Data Parameters  
 NAME Desktop  
 EXPNO 1  
 PROCNO 1

F2 - Acquisition Parameters  
 Date\_ 20191203  
 Time 11.17  
 INSTRUM spect  
 PROBHD 5 mm PABBO BB-  
 PULPROG zg30  
 ID 65536  
 SOLVENT CDCl3  
 NS 5  
 DS 2  
 SWH 8012.820 Hz  
 FIDRES 0.122266 Hz  
 AQ 4.0894465 sec  
 RG 181  
 DW 62.400 usec  
 DE 6.50 usec  
 TE 297.8 K  
 D1 1.00000000 sec  
 TDO 1

----- CHANNEL f1 -----  
 SFO1 400.1324710 MHz  
 NUC1 1H  
 P1 15.00 usec  
 PLW1 11.8999962 W

F2 - Processing parameters  
 SI 65536  
 SF 400.1300160 MHz  
 WDW EM  
 SSB 0  
 LB 0.30 Hz  
 GB 0  
 PC 1.00

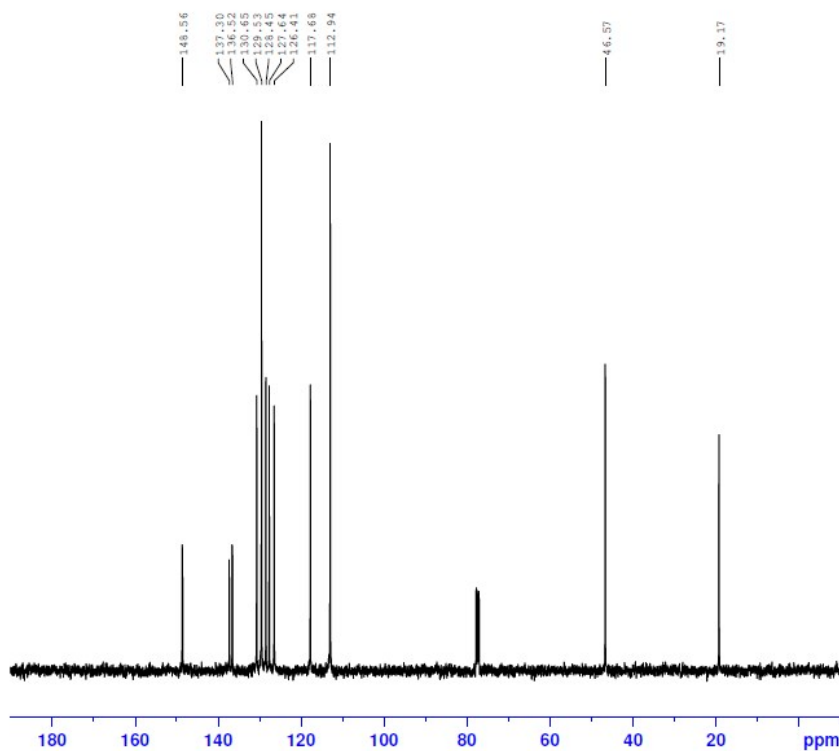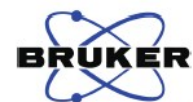

Current Data Parameters  
 NAME Desktop  
 EXPNO 1  
 PROCNO 1

F2 - Acquisition Parameters  
 Date\_ 20191203  
 Time 11.09  
 INSTRUM spect  
 PROBHD 5 mm PABBO BB-  
 PULPROG zgpg30  
 ID 65536  
 SOLVENT CDCl3  
 NS 12  
 DS 4  
 SWH 24038.461 Hz  
 FIDRES 0.366798 Hz  
 AQ 1.3631488 sec  
 RG 114  
 DW 20.800 usec  
 DE 6.50 usec  
 TE 298.2 K  
 D1 2.00000000 sec  
 D11 0.03000000 sec  
 TDO 1

----- CHANNEL f1 -----  
 SFO1 100.6228298 MHz  
 NUC1 13C  
 P1 10.00 usec  
 PLW1 53.46578979 W

----- CHANNEL f2 -----  
 SFO2 400.1316005 MHz  
 NUC2 1H  
 CPDPRG[2] waltz16  
 PCPD2 80.00 usec  
 PLW2 11.70547009 W  
 PLW12 0.37015951 W  
 PLW13 0.37015951 W

F2 - Processing parameters  
 SI 32768  
 SF 100.6127690 MHz  
 WDW EM  
 SSB 0  
 LB 3.00 Hz  
 GB 0  
 PC 1.40



**Table S1** Reported Non-Precious Metal-Based Catalysts for One-pot Reductive Amination of Benzaldehyde with Nitrobenzene using H<sub>2</sub> as reductant.

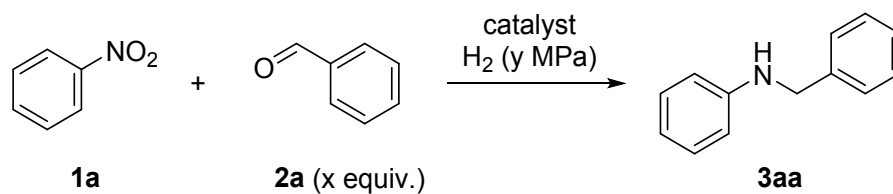

| entry | catalyst                              | x (equiv.) | y (MPa) | temp. (°C) | yield (%) | TON  | ref.      |
|-------|---------------------------------------|------------|---------|------------|-----------|------|-----------|
| 1     | Ni/NiO-300                            | 1.2        | 0.5     | 80         | 89        | 4.1  | This work |
| 2     | Fe <sub>2</sub> O <sub>3</sub> /NGr@C | 2          | 7       | 170        | 85        | 17   | S10       |
| 3     | Cu/Al <sub>2</sub> O <sub>3</sub>     | 1.5        | 5       | 125        | 67        | 573  | S11       |
| 4     | Co <sub>2</sub> O <sub>3</sub> /NGr@C | 2          | 5       | 110        | 95        | 47.5 | S12       |
| 5     | Co-DABCO-TPA@C                        | 1.5        | 4       | 120        | 92        | 26.3 | S13       |
| 6     | Co-N <sub>x</sub> /C                  | 2          | 1       | 110        | 98        | 5.8  | S14       |
| 7     | Co/mCN                                | 1.5        | 1       | 150        | 99.8      | 49.2 | S15       |
| 8     | MoS <sub>2</sub>                      | 1.4        | 2       | 120        | 85        | 13.7 | S16       |
| 9     | Ni@NC                                 | 2          | 2       | 100        | 98        | 44.9 | S17       |

**Table S2** Reported Non-Precious Metal-Based Catalysts for One-pot Reductive Amination of Benzaldehyde with Nitrobenzene using other reductant.

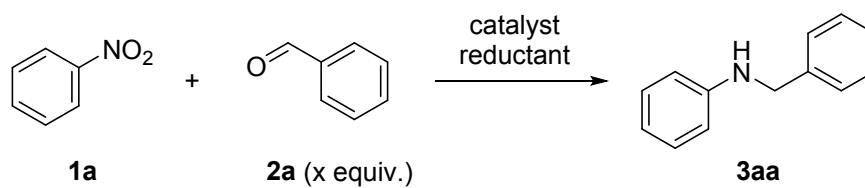

| entry | catalyst      | reductant           | x (equiv.) | temp. (°C) | yield of <b>3aa</b> (%) | ref. |
|-------|---------------|---------------------|------------|------------|-------------------------|------|
| 1     | Co@CN-600AT   | HCOOH               | 2          | 190        | 96                      | S18  |
| 2     | Co@CN-800     | HCOOH               | 2          | 170        | 89                      | S19  |
| 3     | Co-Nx/C-800AT | HCOOH               | 2          | 150        | 96                      | S20  |
| 4     | Co/N-C-600    | CO/H <sub>2</sub> O | 2          | 170        | 99                      | S21  |

**Table S3** Crystallite Diameter of Ni/NiO

| Entry | Catalyst   | Crystallite Diameter (nm) <sup>a</sup> |     |
|-------|------------|----------------------------------------|-----|
|       |            | Ni                                     | NiO |
| 1     | Ni/NiO-200 | -                                      | 49  |
| 2     | Ni/NiO-250 | -                                      | 57  |
| 3     | Ni/NiO-300 | 73                                     | 59  |
| 4     | Ni/NiO-350 | 82                                     | 63  |
| 5     | Ni/NiO-400 | 95                                     | -   |
| 6     | Ni/NiO-500 | 115                                    | -   |

<sup>a</sup> Crystallite sizes were determined by XRD.

**Table S4** Optimization Study<sup>a</sup>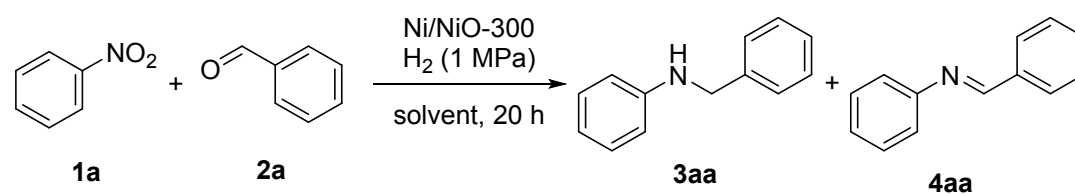

| Entry           | Solvent                         | Temp. (°C) | Conv. of <b>1a</b> (%) | Yield of <b>3aa</b> (%) | Yield of <b>4aa</b> (%) |
|-----------------|---------------------------------|------------|------------------------|-------------------------|-------------------------|
| 1               | toluene                         | 80         | >99                    | 77                      | 5                       |
| 2               | methanol                        | 80         | >99                    | trace                   | 38                      |
| 3               | THF                             | 80         | 23                     | –                       | 3                       |
| 4               | DMF                             | 80         | >99                    | –                       | –                       |
| 5               | CH <sub>2</sub> Cl <sub>2</sub> | 80         | 47                     | 4                       | 13                      |
| 6               | CH <sub>3</sub> CN              | 80         | 61                     | trace                   | 20                      |
| 7               | toluene                         | 100        | >99                    | 83                      | 1                       |
| 8               | toluene                         | 70         | >99                    | 76                      | 4                       |
| 9               | toluene                         | 60         | >99                    | trace                   | 70                      |
| 10 <sup>b</sup> | toluene                         | 80         | >99                    | 90                      | trace                   |

<sup>a</sup> Reaction conditions: Ni/NiO-300 (0.05 g), **1a** (0.5 mmol), **2a** (0.5 mmol), solvent (5 mL), H<sub>2</sub> (1 MPa), 80 °C, 20 h. Conversion and yield were determined by GC analysis.

<sup>b</sup> 15 mg of Ni/NiO was used. Run for 40 h.



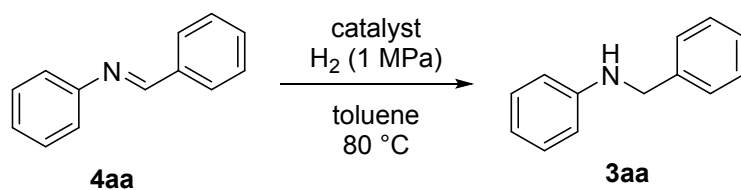

| Entry | Catalyst            | Time (h) | Conv. of <b>4aa</b> (%) | Yield of <b>3aa</b> (%) |
|-------|---------------------|----------|-------------------------|-------------------------|
| 1     | Ni/NiO-300          | 5        | 92                      | 89                      |
| 2     | Ni/NiO-300          | 10       | 99                      | 92                      |
| 3     | Ni/NiO-300          | 15       | >99                     | 96                      |
| 4     | Ni/SiO <sub>2</sub> | 5        | 20                      | 5                       |
| 5     | Ni/SiO <sub>2</sub> | 10       | 48                      | 35                      |
| 6     | Ni/SiO <sub>2</sub> | 15       | 83                      | 70                      |

<sup>a</sup> Reaction conditions: catalyst (0.05 g), **4aa** (1 mmol), toluene (1 mL), H<sub>2</sub> (1 MPa), 80 °C. Conversion and yield were determined by GC analysis

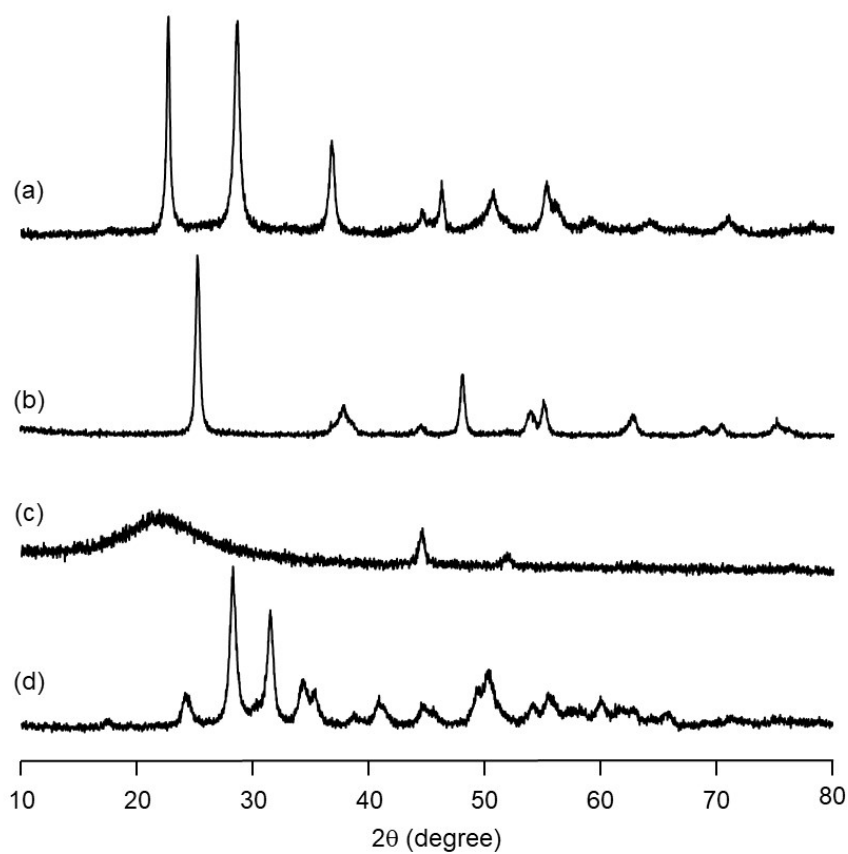

**Fig. S1** XRD patterns of supported Ni catalysts. (a) Ni/Nb<sub>2</sub>O<sub>5</sub>, (b) Ni/TiO<sub>2</sub>, (c) Ni/SiO<sub>2</sub>, (d) Ni/ZrO<sub>2</sub>.

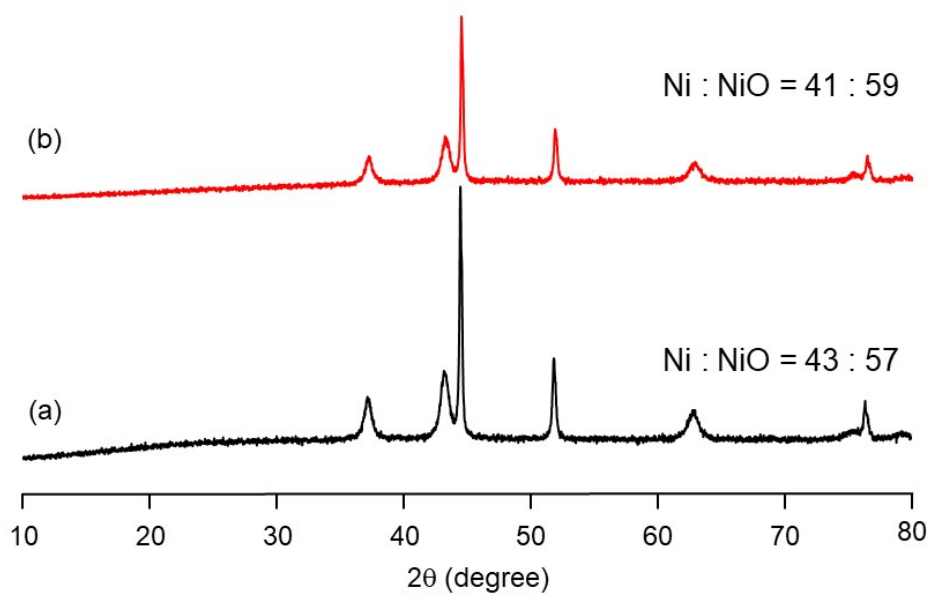

**Fig. S2** XRD patterns for (a) fresh Ni/NiO-300 and (b) recovered Ni/NiO-300

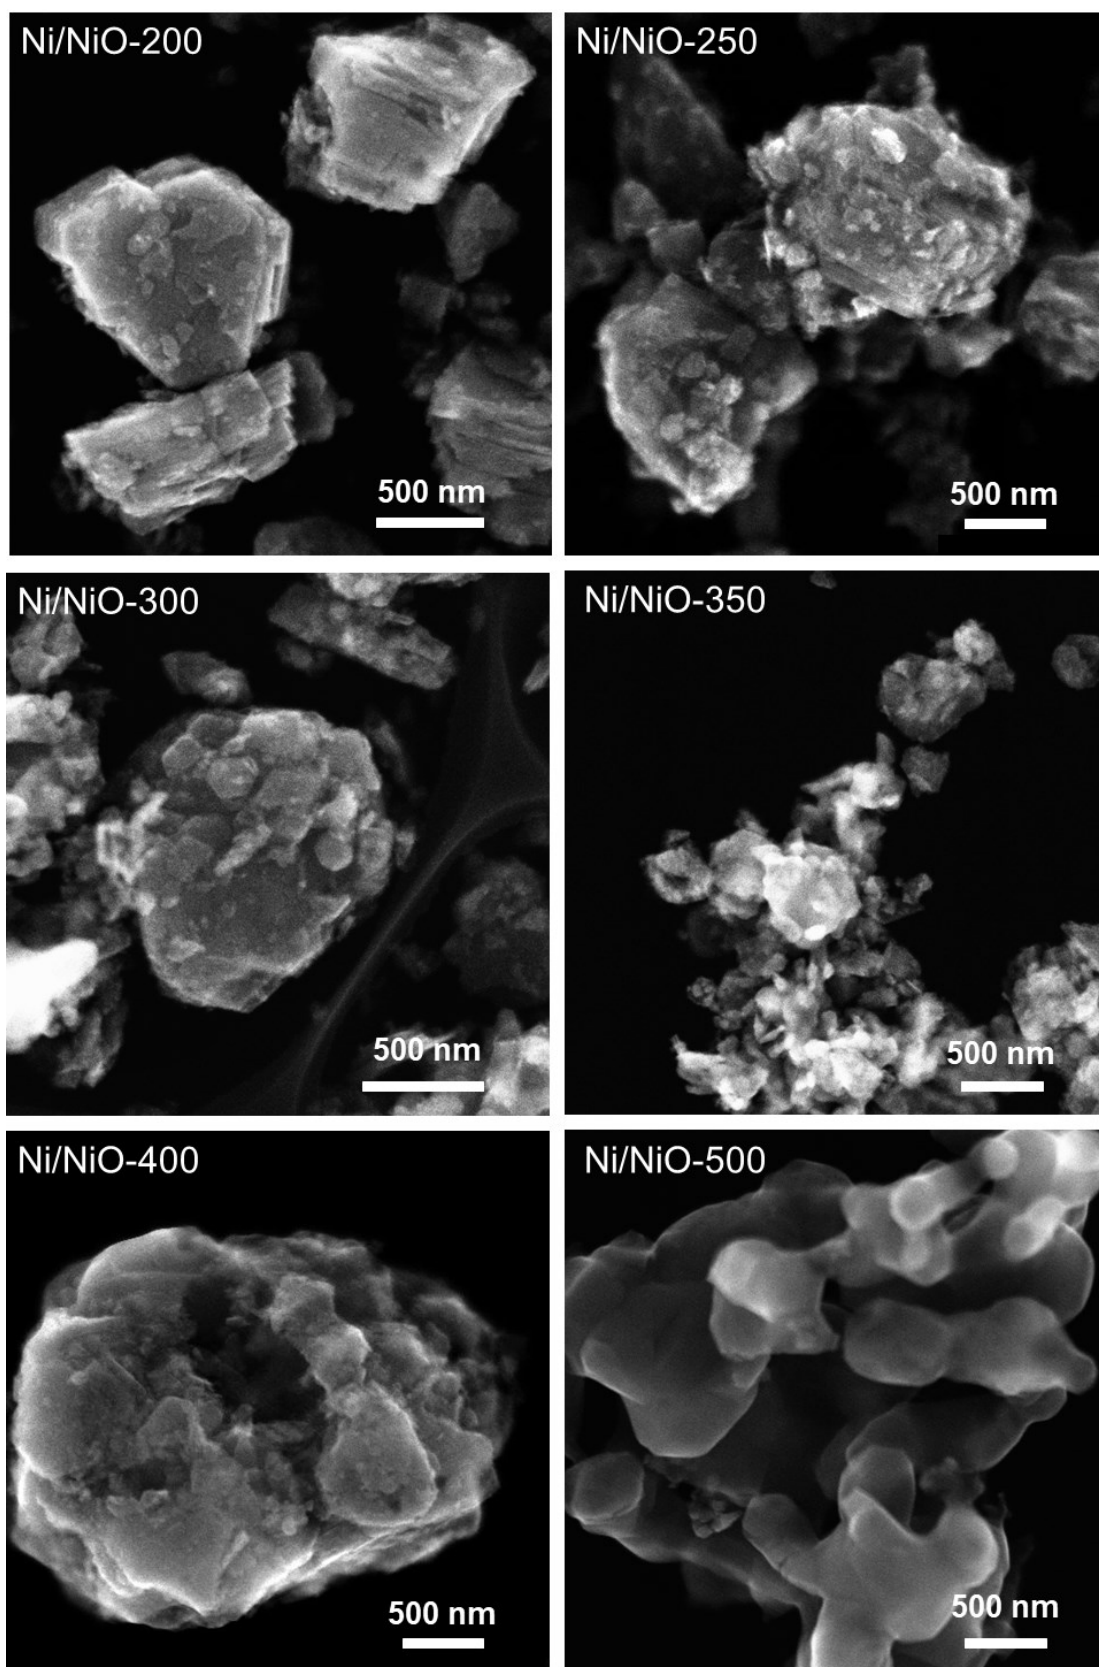

**Fig. S3** SEM images of Ni/NiO-x

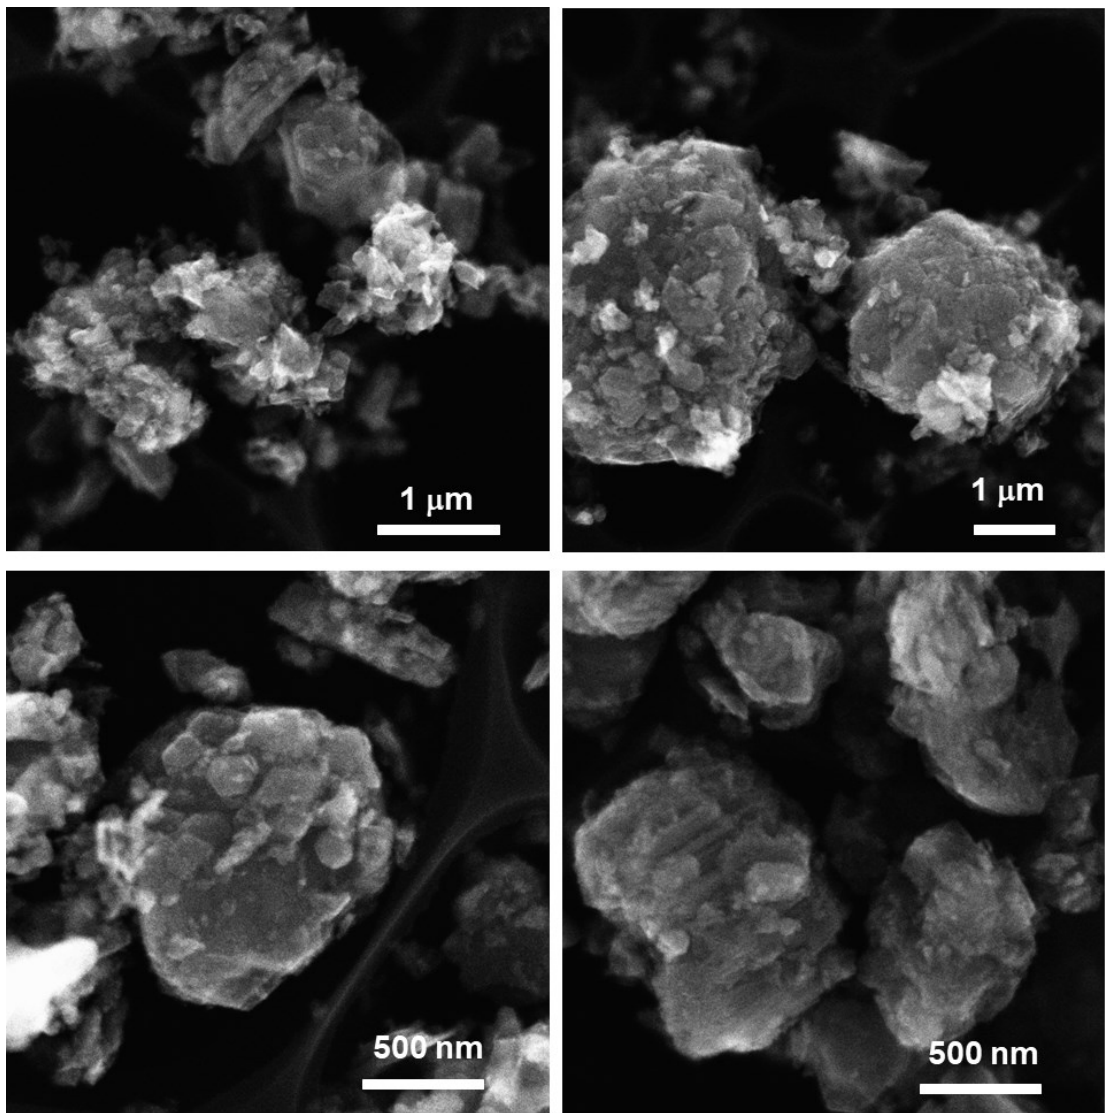

**Fig. S4** SEM images of Ni/NiO-300



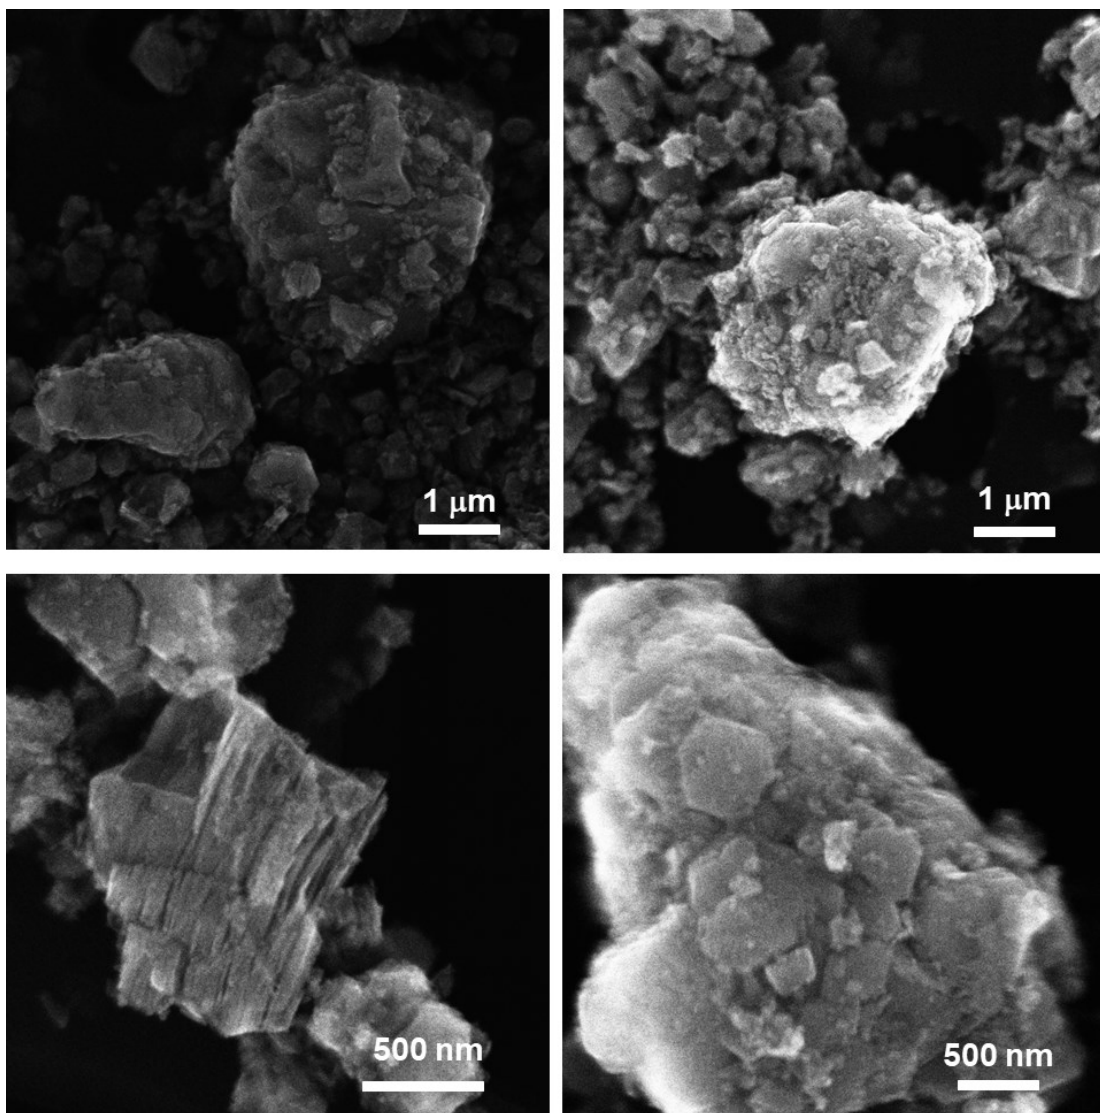

**Fig. S5** SEM images of NiO

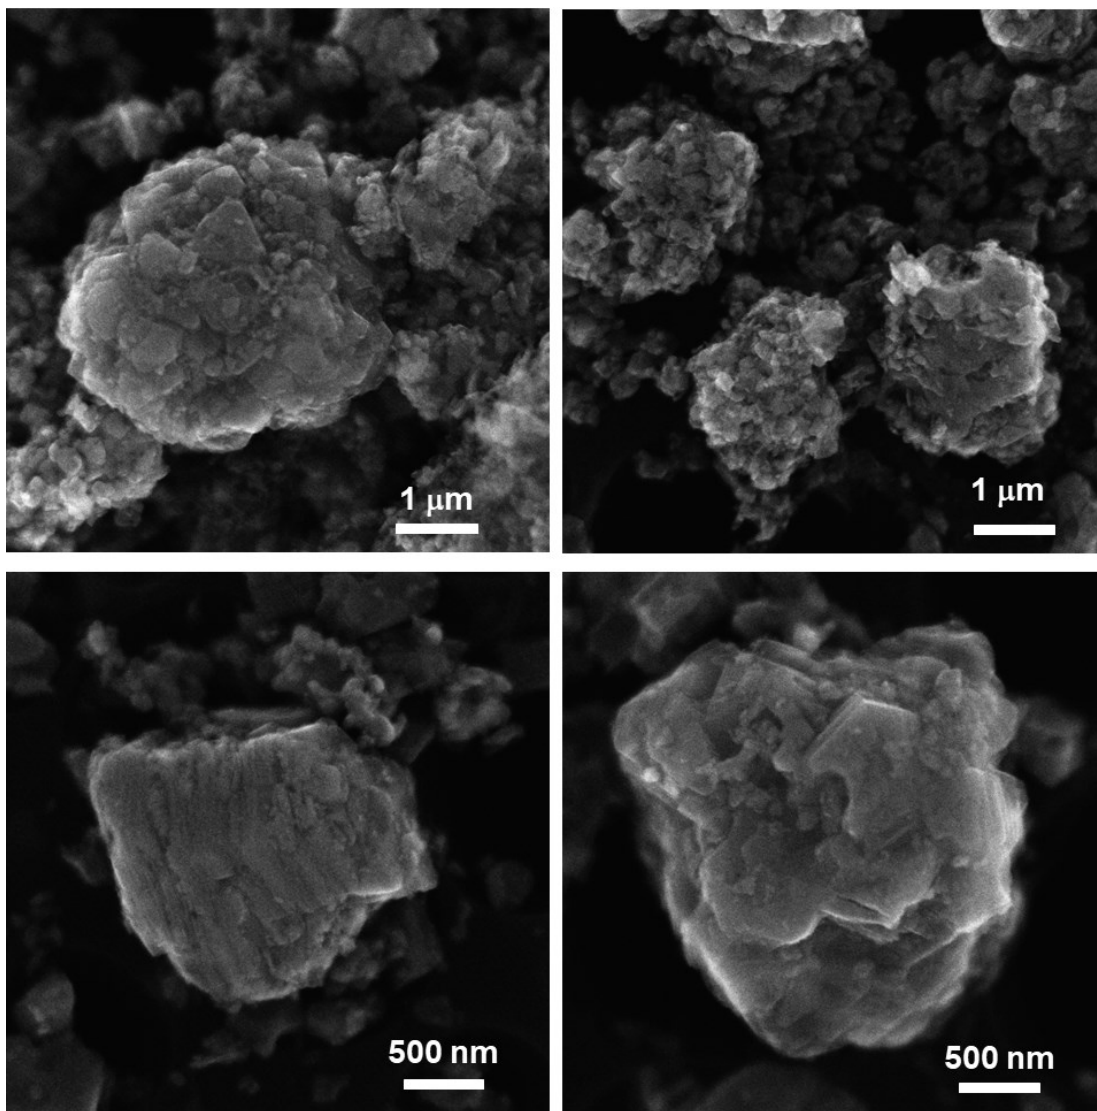

**Fig. S6** SEM images of recovered Ni/NiO-300

## 9. References

- S1 K.-i. Shimizu, K. Kon, W. Onodera, H. Yamazaki and J. N. Kondo, *ACS Catal.*, 2013, **3**, 112–117.
- S2 Y. Peng, Y.-H. Fan, S.-Y. Li, B. Li, J. Xue and Q.-H. Deng, *Org. Lett.*, 2019, **21**, 8389–8394.
- S3 A. Cho, S. Byun and B. M. Kim, *Adv. Synth. Catal.*, 2018, **360**, 1253–1261.
- S4 P. Chaudhary, R. Korde, S. Gupta, P. Sureshbabu, S. Sabiah and J. Kandasamy, *Adv. Synth. Catal.*, 2018, **360**, 556–561.
- S5 C. Wang, C. Chen, J. Han, J. Zhang, Y. Yao and Y. Zhao, *Eur. J. Org. Chem.*, 2015, 2972–2977.
- S6 D. Wei, A. Bruneau-Voisine, D. A. Valyaev, N. Lugan and J. Sortais, *Chem. Commun.*, 2018, **54**, 4302–4305.
- S7 K. Das, A. Mondal, D/ Pal, H. K. Srivastava and D. Srimani, *Organometallics*, 2019, **38**, 1815–1825.
- S8 P. Liu, R. Liang, L. Lu, Z. Yu and F. Li, *J. Org. Chem.*, 2017, **82**, 1943–1950.
- S9 Y. Zhang, X. Qi, X. Cui, F. Shi and Y. Dneg, *Tetrahedron Lett.*, 2011, **52**, 1334–1338.
- S10 T. Stemmler, A.-E. Surkus, M.-M. Pohl, K. Junge and M. Beller, *ChemSusChem*, 2014, **7**, 3012–3016.
- S11 A. L. Nuzhdin, E. A. Artiukha, G. A. Bukhtiyarova, E. A. Derevyannikova and V. I. Bukhtiyarov, *Catal. Commun.*, 2017, **102**, 108–113.
- S12 T. Stemmler, F. A. Westerhaus, A.-E. Surkus, M.-M. Pohl, K. Junge and M. Beller, *Green Chem.*, 2014, **16**, 4535–4540.
- S13 R. V. Jagadeesh, K. Murugesan, A. S. Alshammari, H. Neumann, M.-M. Pohl, J. Radnik and M. Beller, *Science*, 2017, **358**, 326–332.
- S14 L. Jiang, P. Zhou, Z. Zhang, Q. Chi and S. Jin, *New J. Chem.*, 2017, **41**, 11991–11997.
- S15 X. Cui, K. Liang, M. Tian, Y. Zhu, J. Ma and Z. Dong, *J. Colloid Interface Sci.*, 2017, **501**, 231–240.
- S16 Y. Zhang, Y. Gao, S. Yao, S. Li, H. Asakura, K. Teramura, H. Wang and D. Ma, *ACS Catal.*, 2019, **9**, 7967–7975.
- S17 J. Li, B. Wang, Y. Qin, Q. Tao and L. Chen, *Catal. Sci. Technol.*, 2019, **9**, 3726–3734.
- S18 L. Jiang, P. Zhou, Z. Zhang, S. Jin and Q. Chi, *Ind. Eng. Chem. Res.*, 2017, **56**, 12556–12565.
- S19 P. Zhou, Z. Zhang, L. Jiang, C. Yu, K. Lv, J. Sun and S. Wang, *App. Catal. B: Environ.*, 2017, **210**, 522–532.
- S20 P. Zhou and Z. Zhang, *CheSusChem*, 2017, **10**, 1892–1897.
- S21 P. Zhou, C. Yu, L. Jiang, K. Lv and Z. Zhang, *J. Catal.*, 2017, **352**, 264–273.
